# Supplementary material for: CCAAT/enhancer binding protein α predicts poorer prognosis and prevents energy starvation–induced cell death in hepatocellular carcinoma
Source: PubMed Central journal article supplement — Hepatology. 2015 Jan 30;61(3):965–78. doi: 10.1002/hep.27593 (PMC4365685; doi:10.1002/hep.27593), 2015-01-30
Supplement: hep0061-0965-sd1.pdf [file hep0061-0965-sd1.pdf]

## **Supplementary Material and Methods**

### **SubG1 Assay by Flow Cytometry**

After the indicated starvation treatment, the cell cycle profiles were analyzed by FACSCalibur flow cytometer (BD Biosciences, San Jose CA), as described previously.<sup>1</sup> The proportion of subG1 phase was regarded as dead cells.

### **Western-blotting and Antibodies**

Western blotting has been previously described.<sup>1</sup> Antibodies against ACSL3 (sc-271246), ACSL4 (sc-271800), and ACSS2 (sc-85258) were obtained from Santa Cruz Biotechnology (Santa Cruz, CA); AceCS1 (#3658), ACSL1 (#4047), phospho-ACC (ser79, #3661), total-ACC (#3676), phospho-AMPK (thr172, #2535), total AMPK $\alpha$  (#2532), C/EBP $\alpha$  (#2295 and #2843, the latter specifically detecting p42 but not p30), FASN (#3180), phospho-S6 (ser235/236, #2211), and total S6 (#2217) from Cell Signaling Technology; microtubule-associated protein 1 light chain 3 (LC3, #L7543), TMEM166 (SAB2102458) and  $\alpha$ -tubulin (T-5168) from Sigma-Aldrich; Atg7 (#49-385) from ProScience (Poway, CA); and anti-p62 antibody (H00008878-2C11) from Abnova (Taipei, Taiwan).

### **siRNA Sequences for Gene Knock-down Assay**

Three Stealth™ siRNA duplex sequences used for specific targeting C/EBP $\alpha$  were 1) UUG CCC AUG GCC UUG ACC AAG GAG C; 2) CCU UCA ACG ACG AGU UCC UGG CCG A; 3) AGC GCA ACA ACA UCG CGG UGC GCA A. The Stealth™ siRNA sequences used for ATG7 were 1) UUC UCU UGC UUG CAG CAA UGA CGG C; 2) AUU UCU GGA AGC UUC ACU UCG AAG A; 3) UAG AGA GGC UGC CUC ACA GCA UUG G. Two Silencer® siRNAs for TMEM166 were 1) GAU CCA UGC UUA UUA UUU ATT; and 2) AGA GGA CUU UGA ACA AGA ATT.

### **Nile red staining of Intracellular Lipid Droplets**

Lipophilic dye Nile Red (Sigma-Aldrich) was used to detect cellular lipid droplets. Briefly, cells were fixed with 3% paraformaldehyde and then incubated with 0.1  $\mu$ g/ml Nile Red for 10 mins. The images of lipid droplets with green fluorescence were captured by Eclipse TE2000U inverted microscope (Nikon, Melville, NY).

### **Quantitative RT-PCR**

Quantitative reverse-transcription–polymerase chain reaction (qRT-PCR) was performed as previously described (2). Briefly, first-strand cDNA was synthesized with the use of ImProm II reverse transcription system (Promega, Madison, WI) and then subjected to quantitative PCR with the use of a LightCycler 480 system (Roche, Indianapolis, IN). The PCR primer sequences for C/EBPalpha are TGT ATA CCC CTG GTG GGA GA and TCA TAA CTC CGG TCC CTC TG; for TMEM166 are AGC AAC ATC CTA GCG GCC TA and TGT GTG GCA AGA GAT CCT TAT CA; for  $\beta$ -actin are GGA CTT CGA GCA AGA GAT GG and AGC ACT GTG TTG GCG TAC AG, and for SFRS4 are AAA AGT CGG AGC AGG AGT CA and CTC TTC CTG CCC TTC CTC TT.

### **DNA sequencing for CEBPA mutations**

The DNA sequencing for CEBPA mutations in the genomic coding region was carried out from 26 pairs of primary HCCs and 5 HCC cell lines, as described previously.<sup>1</sup> Triplicates of DNA sequencing was conducted to ensure the robustness of the data,

### **Transcriptome analysis**

The transcriptome analysis was conducted as described previously.<sup>2</sup> Briefly, total RNA was extracted from C/EBPalpha-expressing Hep3B and stable shNC, C/EBPalpha-deficient HepG2 and HCC-M, and C/EBPalpha-silenced stable sh4 and sh7 cells. The mRNAs from each cell lines were reversibly transcribed by Genechip 3'IVT Express kit (Affymetrix, Santa Cruz, CA) and biotin labeled. The final cDNAs were hybridized to human HG-U1331 and HG-U133-B oligonucleotide probe arrays (Affymetrix) according to the manufacturer's instructions.

References:

1. Lu, G.D., Leung, C.H., Yan, B., Tan, C.M., Low, S.Y., Aung, M.O., Salto-Tellez, M., Lim, S.G., and Hooi, S.C. 2010. C/EBPalpha is up-regulated in a subset of hepatocellular carcinomas and plays a role in cell growth and proliferation. *Gastroenterology* 139:632-643, 643 e631-634.
2. Ong, H.T., Tan, P.K., Wang, S.M., Hian Low, D.T., Ooi, L.L., and Hui, K.M. 2011. The tumor suppressor function of LECT2 in human hepatocellular carcinoma makes it a potential therapeutic target. *Cancer Gene Ther* 18:399-406.

**Table S1: C/EBPalpha protein was over-expressed in HCC tumor.** C/EBPalpha protein expression in HCC tumor and matched non-tumor tissues was determined by immunohistochemistry staining. Its expressional level was scored into 4-tiered grading system, with 0 as negative expression and 3 as the highest expression. HCC patients were ranked into four different groups according to the difference between C/EBPalpha expression in tumor (TU) and in non-tumor (NT) tissues, with 0 for no difference and 3 the highest up-regulation.

| <b>C/EBP<math>\alpha</math> score<br/>(Tu-NT)</b> | <b>Matched pairs</b> |          |
|---------------------------------------------------|----------------------|----------|
|                                                   | <b>Cases</b>         | <b>%</b> |
| <b><math>\leq 0</math></b>                        | 45                   | 23.6     |
| <b>1</b>                                          | 51                   | 26.7     |
| <b>2</b>                                          | 61                   | 31.9     |
| <b>3</b>                                          | 34                   | 17.8     |
| <b>Total</b>                                      | 191                  | 100      |

**Table S2: Comparison of common clinicopathological parameters in human primary HCC patients with or without C/EBP $\alpha$  up-regulation.** We compared the common clinicopathological parameters between HCC patients with and without C/EBP $\alpha$  up-regulation by student *t*-test or *chi*-square. The number of cases and *p*-values in two different groups were listed as indicated.

|                                           | No C/EBP $\alpha$ up-regulation<br>(Tu-NT $\leq$ 0, n=42) | C/EBP $\alpha$ up-regulation<br>(Tu-NT $\geq$ 1, n=134) | <i>p</i> -value |
|-------------------------------------------|-----------------------------------------------------------|---------------------------------------------------------|-----------------|
| Age (mean $\pm$ SD years)                 | 57.4 $\pm$ 15.4                                           | 58.2 $\pm$ 13.0                                         | 0.730           |
| Gender: Male (%)                          | 32 (76.2%)                                                | 106 (79.1%)                                             | 0.502           |
| Race: Chinese (%)                         | 35 (83.3%)                                                | 103 (77.4%)                                             | 0.518           |
| HBV carrier (% in x cases)                | 26 (63.4% in 41 cases)                                    | 84 (66.7% in 126 cases)                                 | 0.708           |
| HCV carrier (% in x cases)                | 2 (4.9% in 41 cases)                                      | 10 (7.8% in 128 cases)                                  | 0.733           |
| Drinker or ex-drinker (%)                 | 12 (33.3% in 36 cases)                                    | 45 (40.2% in 112 cases)                                 | 0.556           |
| Diabetes mellitus (%)                     | 11 (27.5% in 40 cases)                                    | 32 (24.8% in 129 cases)                                 | 0.836           |
| Cirrhosis (%)                             | 23 (54.8%)                                                | 72 (53.7%)                                              | 1.000           |
| Tumor size (%):                           |                                                           |                                                         | 0.805           |
| < 2 cm                                    | 3 (7.3%)                                                  | 10 (7.5%)                                               |                 |
| 2~ 5 cm                                   | 15 (36.6%)                                                | 56 (42.1%)                                              |                 |
| $\geq$ 5 cm                               | 23 (56.1%)                                                | 67 (50.4%)                                              |                 |
| No. of tumor nodules:                     |                                                           |                                                         | 0.559           |
| Single nodule                             | 28 (66.7%)                                                | 97 (72.4%)                                              |                 |
| Two or more                               | 14 (33.3%)                                                | 37 (27.6%)                                              |                 |
| Tumor stage (%):                          |                                                           |                                                         | 0.859           |
| I                                         | 22 (53.7%)                                                | 63 (49.2%)                                              |                 |
| II                                        | 12 (29.3%)                                                | 39 (30.5%)                                              |                 |
| III & IV                                  | 7 (17.0%)                                                 | 26 (20.3%)                                              |                 |
| Serum AFP level<br>(mean $\pm$ SD, ng/mL) | 41.8 $\pm$ 17.8                                           | 71.5 $\pm$ 17.4                                         | 0.329           |
| Vascular invasion (%)                     | 11 (34.4% in 32 cases)                                    | 42 (36.5% in 115 cases)                                 | 0.823           |

**Table S3: C/EBPalpha protein expressions in human recurrent HCC were similar to those in primary HCC.** We determined the C/EBPalpha expression in 9 pairs of HCC primary tumor, neighboring non-tumor tissues and matched recurrent tumor. \*  $p = 0.005$ , primary HCC vs. non-tumor (by paired-samples  $t$ -test) #  $p = 0.008$ , recurrent HCC vs. non-tumor (by paired-samples  $t$ -test) and §  $p = 0.800$ , primary vs. recurrent HCC (by Pearson correlation analysis)

| <b>Patient Code</b> | <b>Neighboring non-tumor liver tissue</b> | <b>Primary HCC tissues*</b> | <b>Recurrent HCC tissues #, §</b> | <b>Time to develop recurrence (months)</b> |
|---------------------|-------------------------------------------|-----------------------------|-----------------------------------|--------------------------------------------|
| 10894               | 0                                         | 0                           | 0                                 | 31                                         |
| 10245               | 1                                         | 3                           | 2                                 | 5                                          |
| 14778               | 0                                         | 2                           | 3                                 | 5                                          |
| 0005                | 0                                         | 2                           | 3                                 | 9                                          |
| 3635                | 1                                         | 1                           | 1                                 | 43                                         |
| 8691                | 0                                         | 3                           | 2                                 | 59                                         |
| 11421               | 1                                         | 1                           | 1                                 | 14                                         |
| 14405               | 0                                         | 3                           | 3                                 | 6                                          |
| 15621               | 1                                         | 3                           | 3                                 | 24                                         |

## Supplementary Figure Legends

### **Figure S1: C/EBPalpha up-regulation predicted poorer patient survival in primary HCC.**

(A) HCC patients were ranked into 4 different groups according to C/EBPalpha protein level in tumor tissues, with 0 for no expression and 3 highest expressions. A Kaplan-Meier survival analysis showed that the higher the C/EBPalpha expressed in tumor HCCs the poorer overall survival was. (B) HCC patients were ranked into 2 different groups according to C/EBPalpha expression in adjacent normal liver tissues (no expression vs. overexpression). (C and D) Kaplan-Meier survival analyses showed that C/EBPalpha overexpression tended to predict poorer overall survival in the HCC patients with low level of serum AFP (< 300 ng/mL) but not those with high. (E and F) Kaplan-Meier survival analyses showed that C/EBPalpha overexpression predicted poorer overall survival in the HCC patients with microscopic vascular invasion but not those without.

### **Figure S2: C/EBPalpha mRNA expression was correlated with protein in primary HCC.**

C/EBPalpha mRNA expression was determined by qRT-PCR and normalized by SFRS4 mRNA expression. (A) C/EBPalpha mRNA expression was correlated with protein expression by using Pearson correlation analysis. (B) C/EBPalpha mRNA expression was upregulated in HCC tumors compared with matched non-tumor tissues.

### **Figure S3: C/EBPalpha protected HCC cells from energy starvation induced cells death.**

(A) C/EBPalpha-expressing cells (Hep3B and shNC) and C/EBPalpha-silenced cells (sh4 and sh7) were kept in full DMEM medium without changing or supplementing fresh medium for four weeks. The adherent cells and floating dead cells were collected for subG1 analysis. (B) C/EBPalpha-expressing shNC control and C/EBPalpha-silenced cells (sh4 and sh7) cells were cultured in the glucose and glutamine double free medium (DN) or supplemented with 1 g/L glucose (DN+Glu) or 4.0 mM L-glutamine (DN+Gln) for two days. The cell death was determined by subG1 assay. (C) Stable PLC/5 cells silenced of C/EBPalpha by specific shRNA (sh1 and sh2) were generated and selected as in Fig. 3. The cells were starved for

two days. **(D)** HCC cells were starved in the glucose and glutamine-free DMEM medium in a hypoxia incubator for 8 hr.

**Figure S4: Lipid catabolism was essential for C/EBPalpha-mediated survival.**

**(A)** C/EBPalpha-expressing (Hep3B and shNC) and C/EBPalpha-silenced stable cells (sh4 and sh7) were starved in a time course. The intracellular levels of pyruvate and glycogen were determined by biochemical assays. **(B)** HCC cells were starved for 8 hr. The lipid droplets were visualized by staining with 1  $\mu$ M Nile red and the images captured by Nikon inverted fluorescent camera. **(C)** Hep3B cells were pretreated with liposynthesis inhibitor C75 (5 $\mu$ g/mL), simvastatin (statin, 10 $\mu$ M) and diethylm-belliferyl phosphate (DEBP, 50 $\mu$ M) for two weeks. The intracellular lipid droplets were determined as in panel B.

**Figure S5: C/EBPalpha-expressing cells had higher expression of key enzymes involved in lipid and fatty acid metabolism.**

**(A)** C/EBPalpha-expressing (Hep3B and shNC) and -silenced stable cells (sh4 and sh7) were starved for 4 and 8 hours. The alterations of autophagic upstream AMPK and mTOR pathways were analyzed by Western blotting. **(B)** The key enzymes involved in lipid and fatty acid metabolism in the stable cells were determined by Western blotting. **(C)** Different HCC cell lines were starved for 6 hr and the proteins were collected for Western blotting.

**Figure S6: TMEM166 was required for autophagy-involved lipid metabolism.**

**(A)** To identify autophagic executive genes that may be regulated by C/EBPalpha, we compared the transcriptomes from cells expressing C/EBPalpha with those from cells without. The first comparison was between C/EBPalpha-expressing Hep3B and C/EBPalpha-deficient HepG2 and HCC-M cells. The second comparison was between C/EBPalpha-expressing shNC control cells and C/EBPalpha-silenced cells (sh4 and sh7). 84 genes were found to be differentially expressed at least tenfold in both sets of comparisons. **(B)** The mRNA level of C/EBPalpha and TMEM166 were determined by qRT-PCR and normalized with those in Hep3B cells respectively. **(C)** TMEM166 was silenced by specific siRNA (si1 and si2) before energy starvation. The intracellular lipid droplets were detected by Nile red staining as in Fig.



S4B. **(D)** TMEM166 was overexpressed in the C/EBPalpha-deficient HCC-M cells. The fatty acid beta-oxidation rates were determined as in Fig. 4C.

**Figure S7: C/EBPalpha up-regulation predicted poorer patient survival in recurrent HCC.**

Kaplan-Meier survival analyses showed that neither C/EBPalpha upregulation **(A)** nor its expression levels in tumor tissues **(B)** were associated with tumor recurrence. **(C)** The HCC patients with recurrent tumors and who had elevated C/EBPalpha expression in the primary tumor had poorer prognosis.

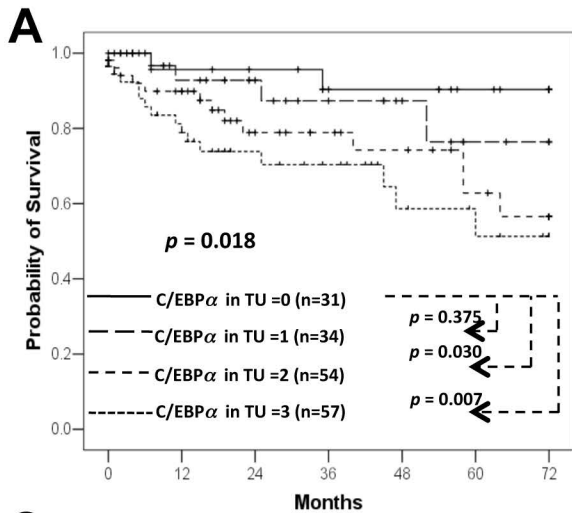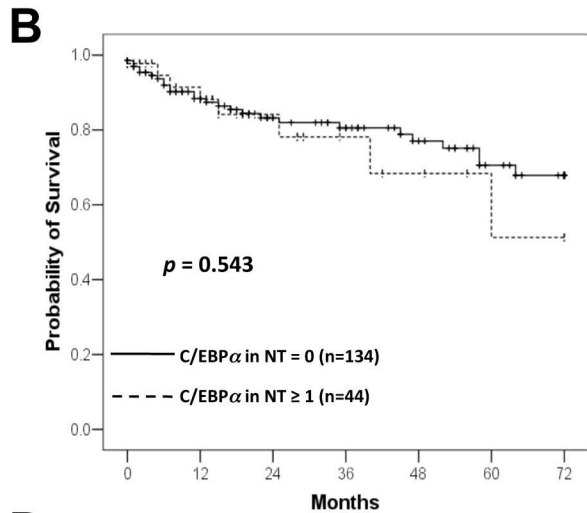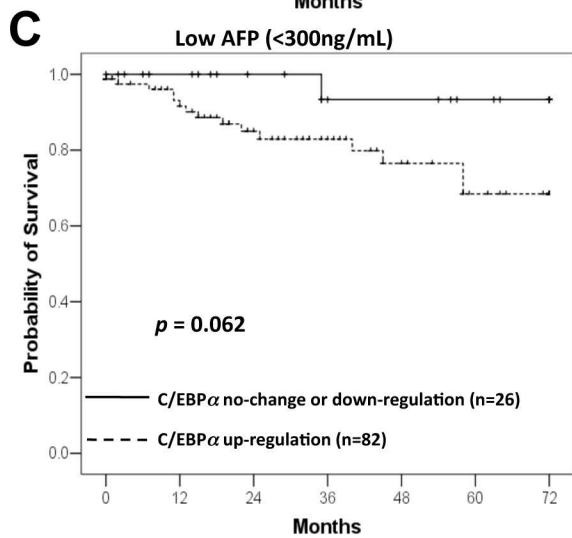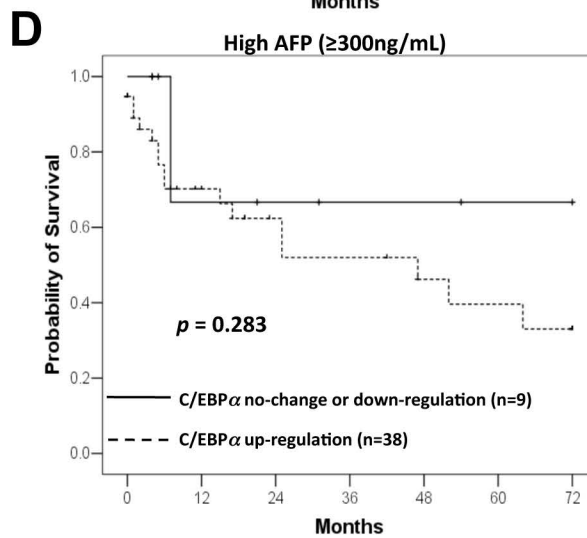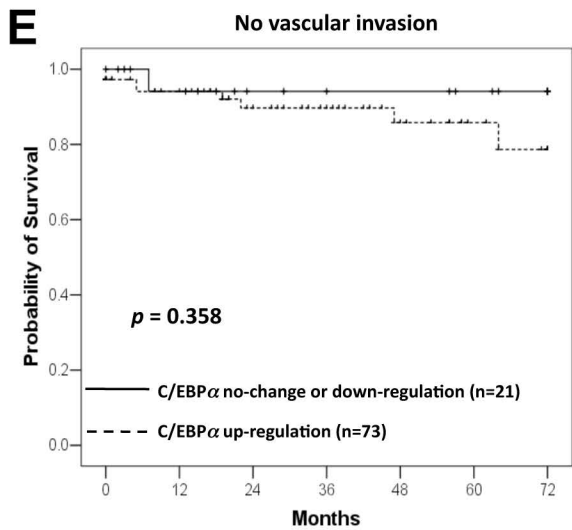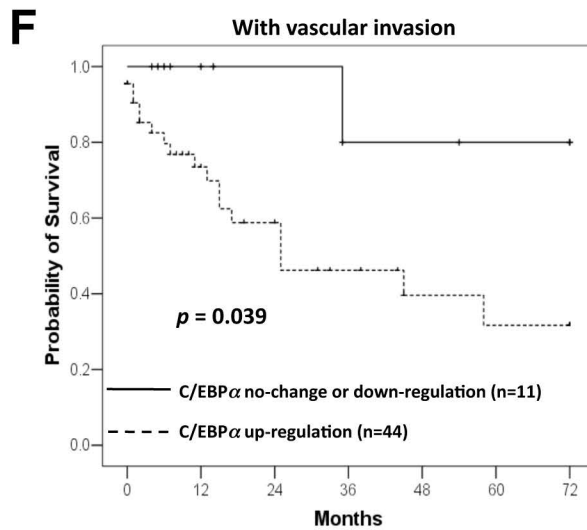

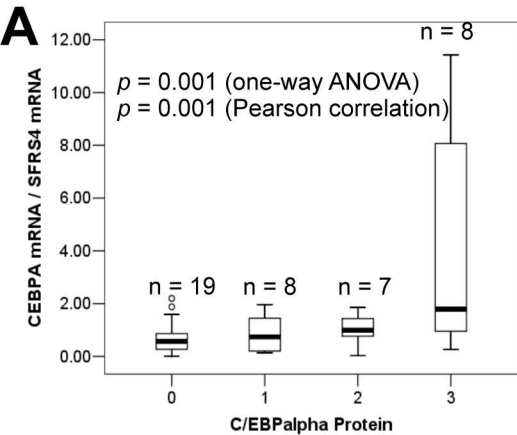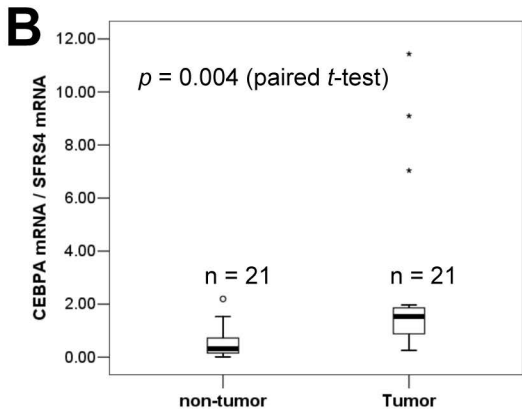

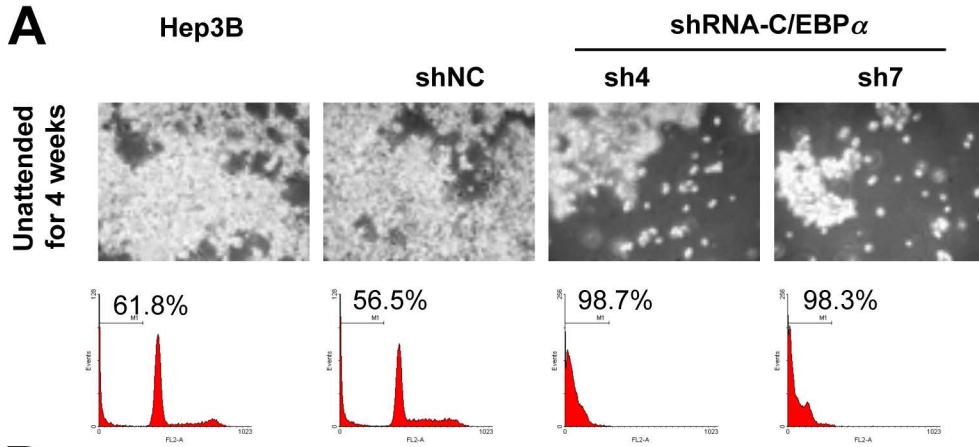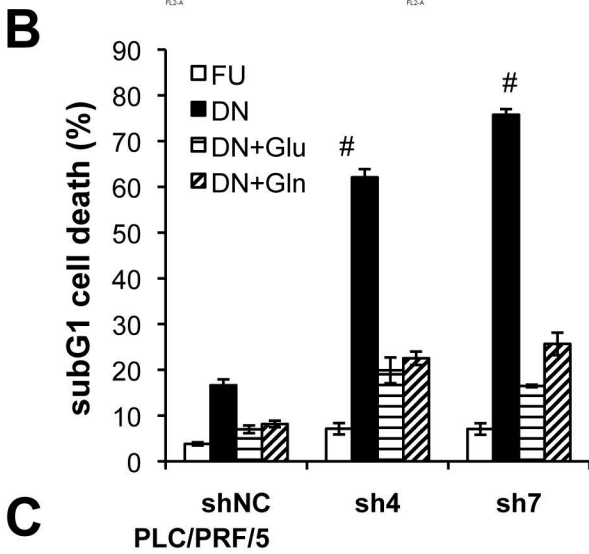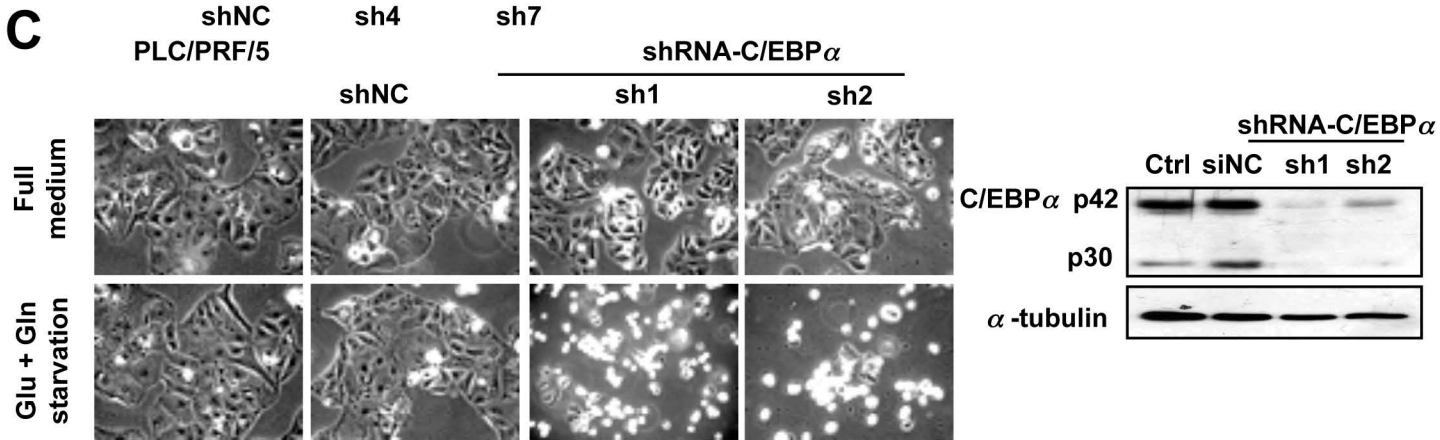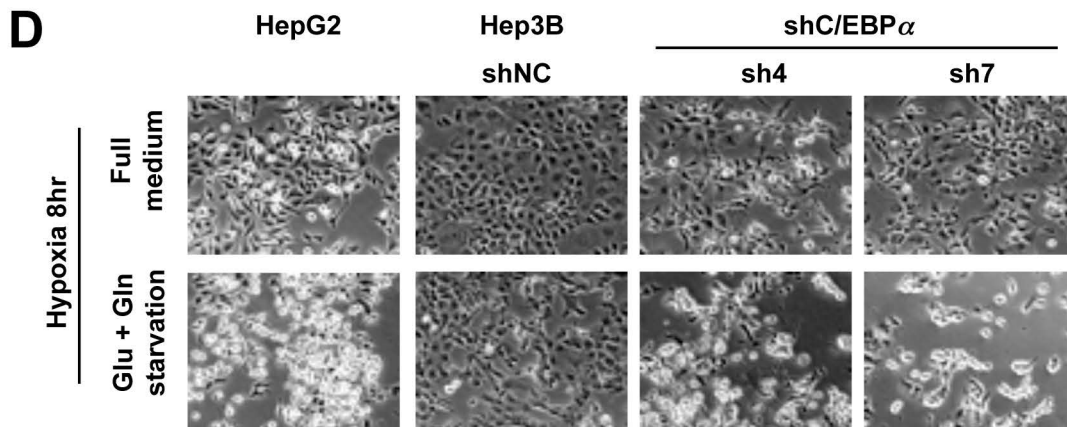

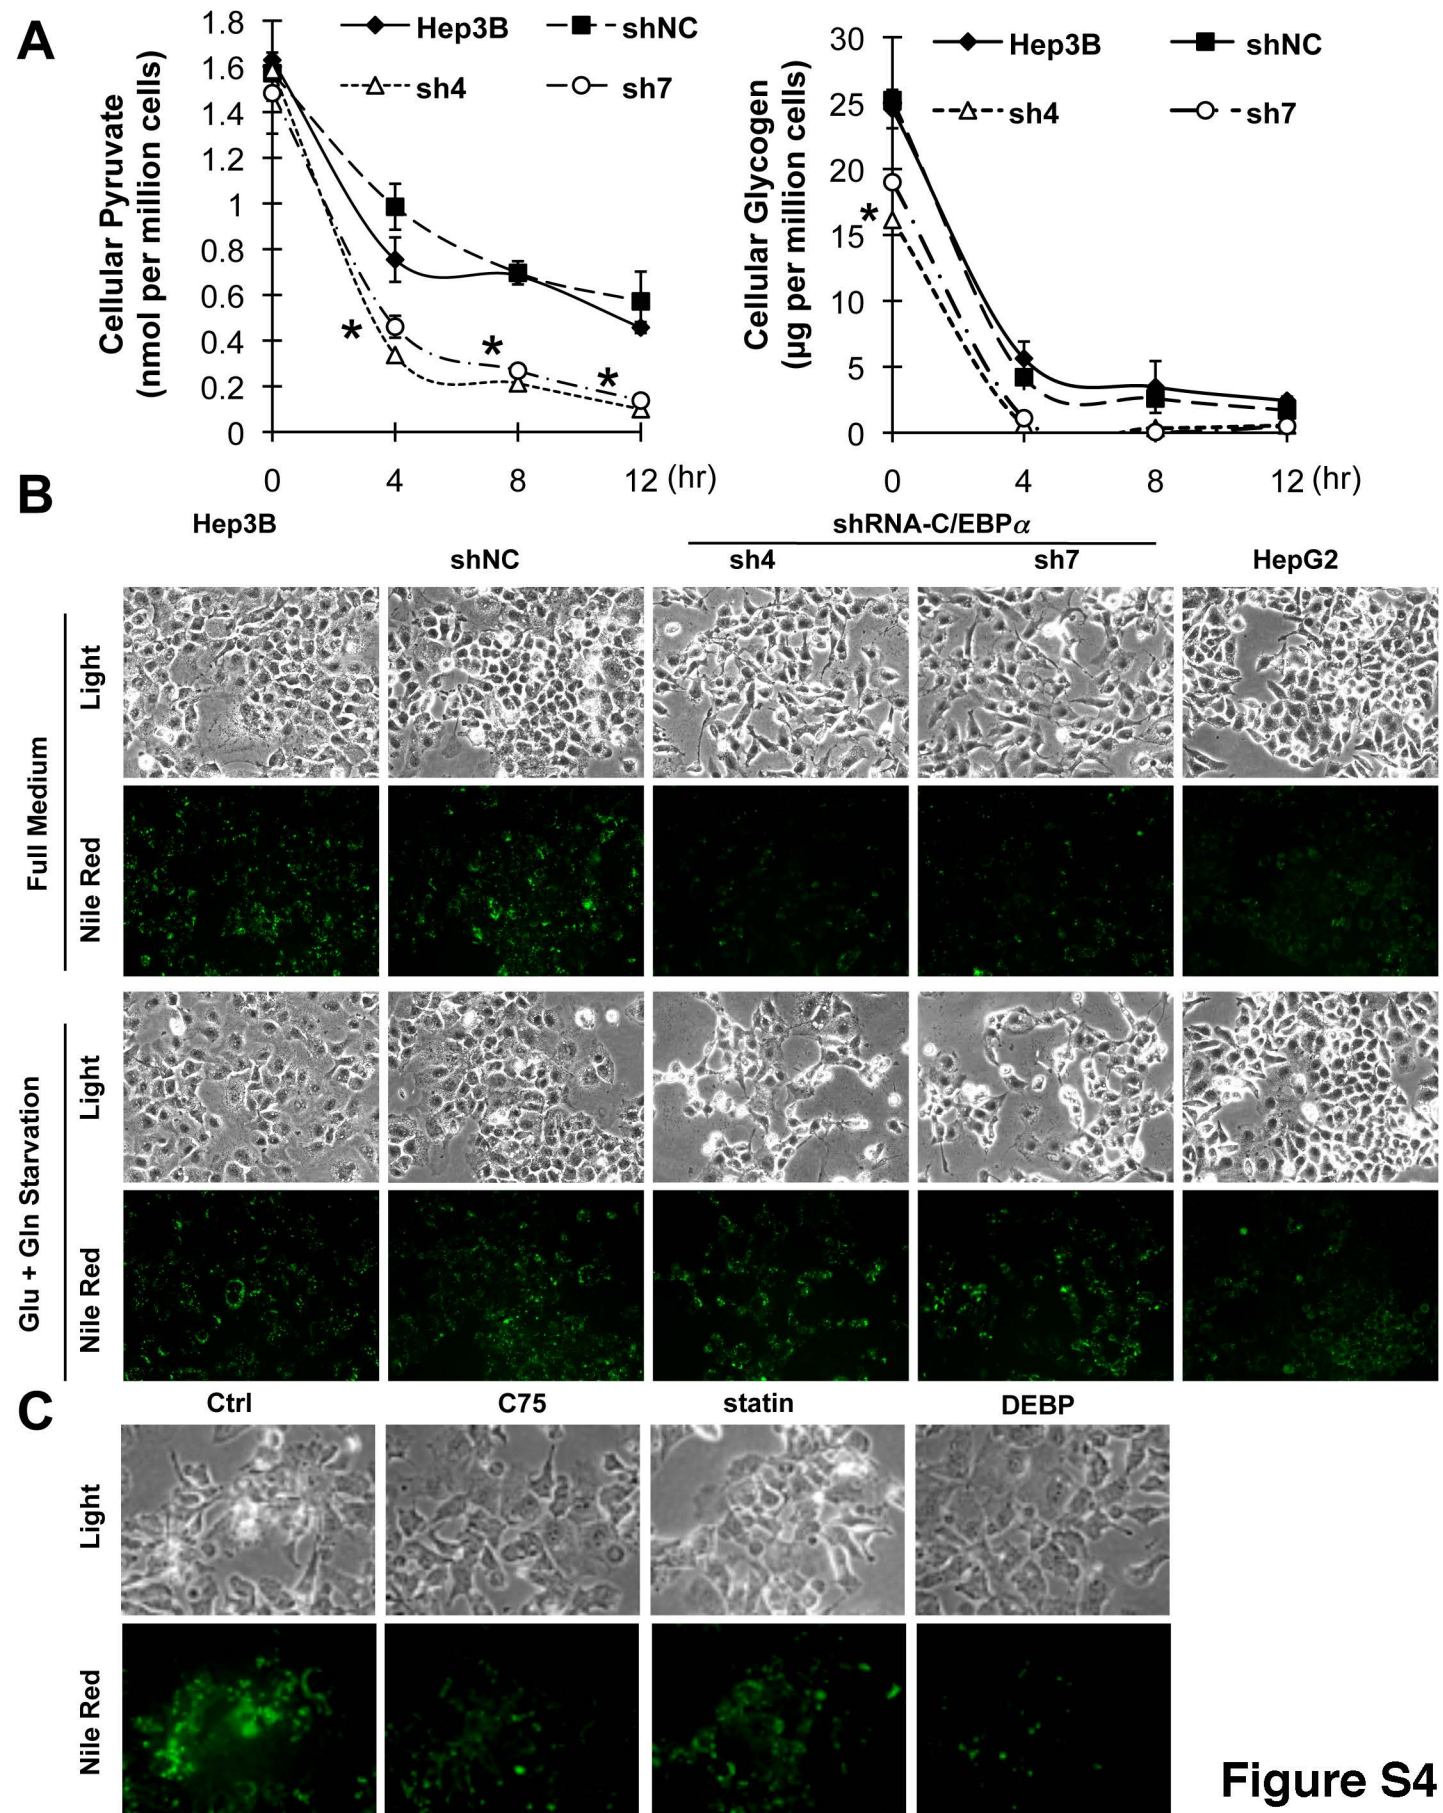

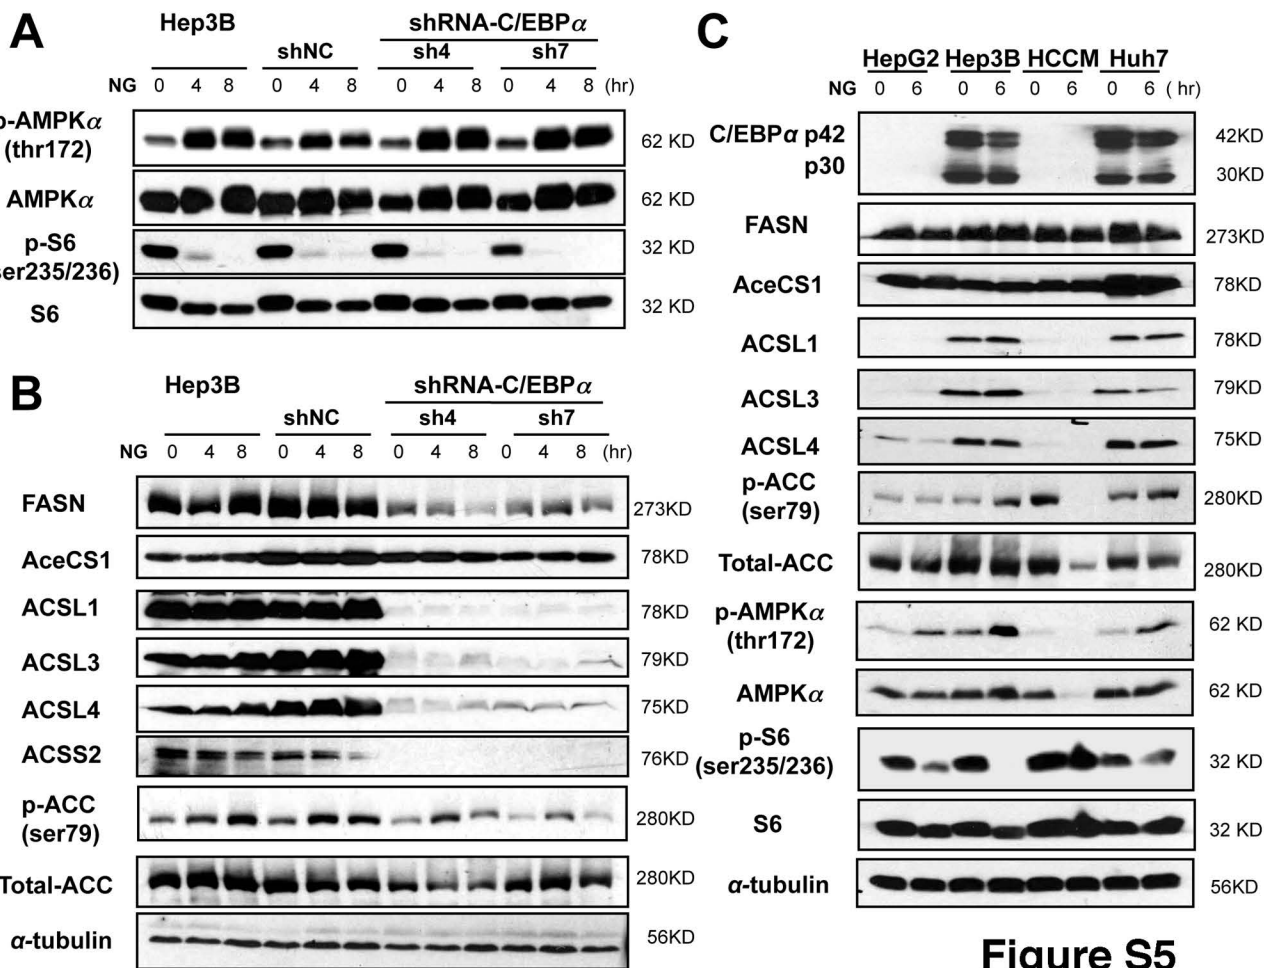

**Figure S5**



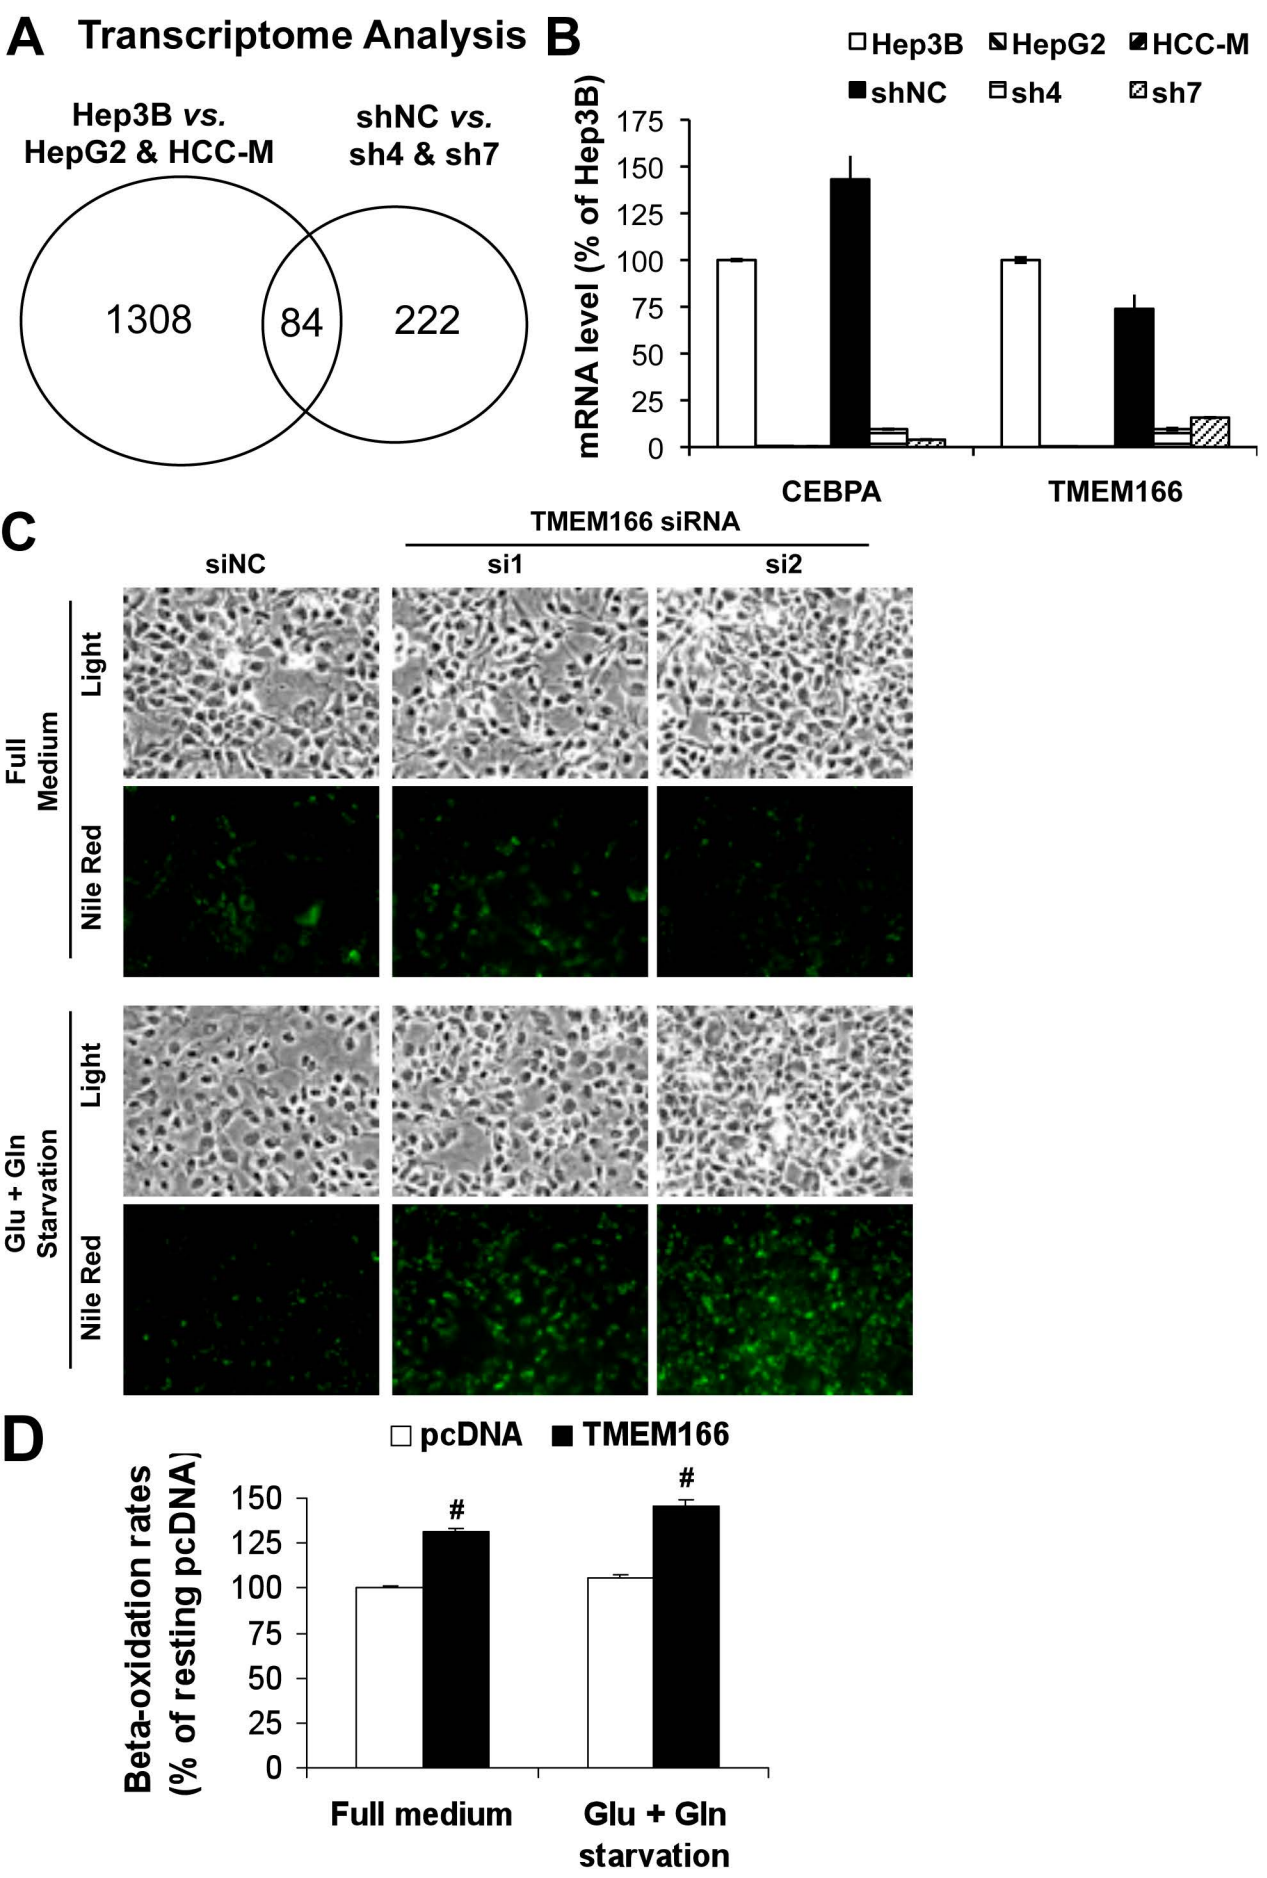

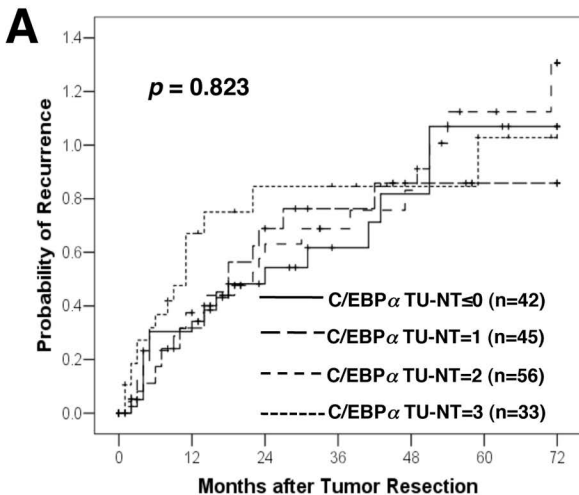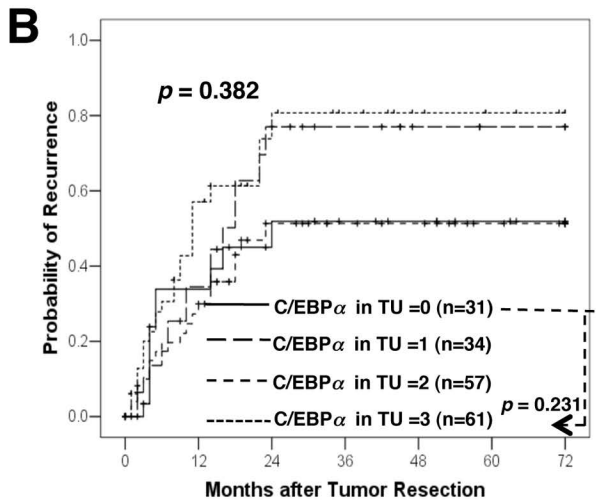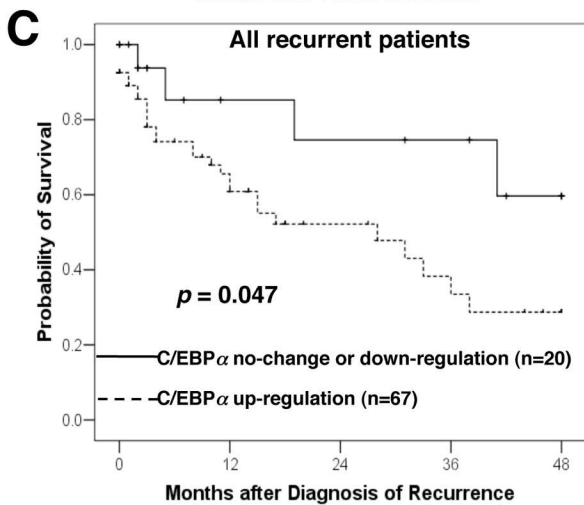

**Figure S7**
